# Supplementary material for: Miniaturized Bioaffinity Assessment Coupled to Mass Spectrometry for Guided Purification of Bioactives from Toad and Cone Snail
Source: MDPI journal article supplement (doi:10.3390/biology3010139), 2014-02-13
Supplement: s1 [file s1]

## Miniaturized Bioaffinity Assessment Coupled to Mass Spectrometry for Guided Purification of Bioactives from Toad and Cone Snail

Ferry Heus<sup>1,†</sup>, Reka A. Otvos<sup>1,2,†</sup>, Ruud L.E.G. Aspers<sup>3</sup>, Rene van Elk<sup>2</sup>, Jenny I. Halff<sup>1</sup>, Andreas W. Ehlers<sup>4</sup>, Sébastien Dutertre<sup>5</sup>, Richard J. Lewis<sup>5</sup>, Sybren Wijmenga<sup>3</sup>, August B. Smit<sup>2</sup>, Wilfried M.A. Niessen<sup>1,6</sup> and Jeroen Kool<sup>1,\*</sup>

<sup>1</sup> AIMMS Division of BioMolecular Analysis, Faculty of Sciences, VU University Amsterdam, De Boelelaan 1081, 1083 HV Amsterdam, The Netherlands; E-Mails: ferryheus@gmail.com (F.H.); r.a.otvos@vu.nl (R.A.O.); j.i.halff@student.vu.nl (J.I.H.); w.m.a.niessen@vu.nl (W.M.A.N.)

<sup>2</sup> Department of Molecular and Cellular Neurobiology, Center for Neurogenomics and Cognitive Research, Neuroscience Campus Amsterdam, VU University Amsterdam, De Boelelaan 1085, 1081 HV Amsterdam, The Netherlands; E-Mails: rene.van.elk@vu.nl (R.E.); guus.smit@vu.nl (A.B.S.)

<sup>3</sup> Department of Biophysical Chemistry, Institute for Molecules and Materials, Radboud University Nijmegen, Heyendaalseweg 135, 6525 AJ Nijmegen, The Netherlands; E-Mails: r.aspers@nmr.ru.nl (R.L.E.G.A.); s.wijmenga@nmr.ru.nl (S.W.)

<sup>4</sup> AIMMS Division of Organic Chemistry, Faculty of Sciences, VU University Amsterdam, De Boelelaan 1081, 1083 HV Amsterdam, The Netherlands; E-Mail: a.w.ehlers@vu.nl

<sup>5</sup> The Institute for Molecular Bioscience, The University of Queensland, St Lucia, Queensland 4072, Australia; E-Mails: s.dutertre@imb.uq.edu.au (S.D.); r.lewis@imb.uq.edu.au (R.J.L.)

<sup>6</sup> hyphen MassSpec Consultancy, de Wetstraat 8, 2332 XT Leiden, The Netherlands

† These authors contributed equally to this work.

\* Author to whom correspondence should be addressed; E-Mail: j.kool@vu.nl; Tel.: +31-205987542; Fax: +31-205987543

*Received: 9 December 2013; in revised form: 23 January 2014 / Accepted: 26 January 2014 /*

*Published: 13 February 2014*

---

**Figure S1.** On-line bioassay analysis of three consecutive 500 nL sample injections containing 0.1, 0.5 and 2.5  $\mu\text{g}$  crude *Conus textile* venom. The 0.1 and 0.5  $\mu\text{g}$  venom injections also contained 40  $\mu\text{M}$  nicotine to align the MS and bioassay trace.

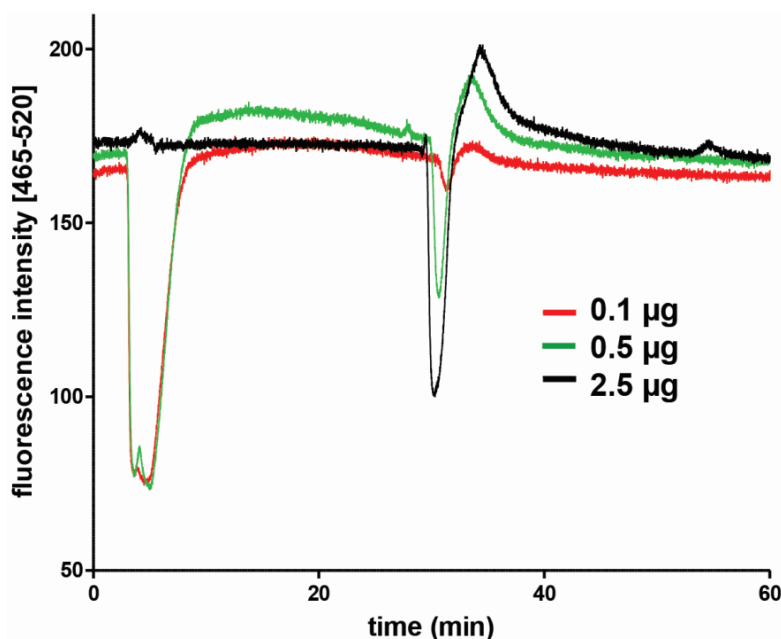

**Figure S2.** An analysis of a 500 nL sample containing 5  $\mu\text{g}$  *Bufo alvarius* skin secretion extract obtained identical binding signals and attributed masses as the *Bufo marinus* extract analysis.

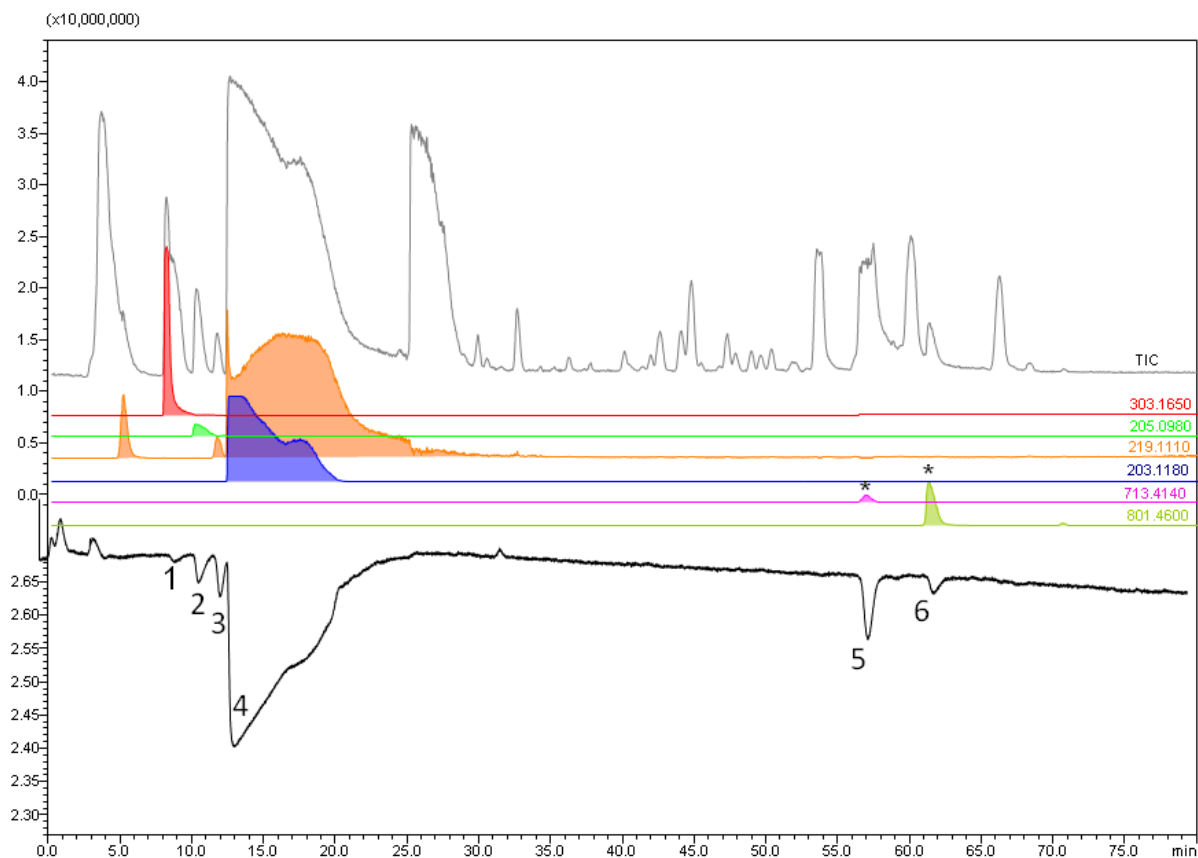

**Figure S3.** MS<sup>2</sup> spectrum of the unknown bioactive compound with  $m/z$  303.168, eluting at 8.5 minutes. In the table below Figure S3, the proposed molecular formula, and proposed fragmentation of the compound is shown.

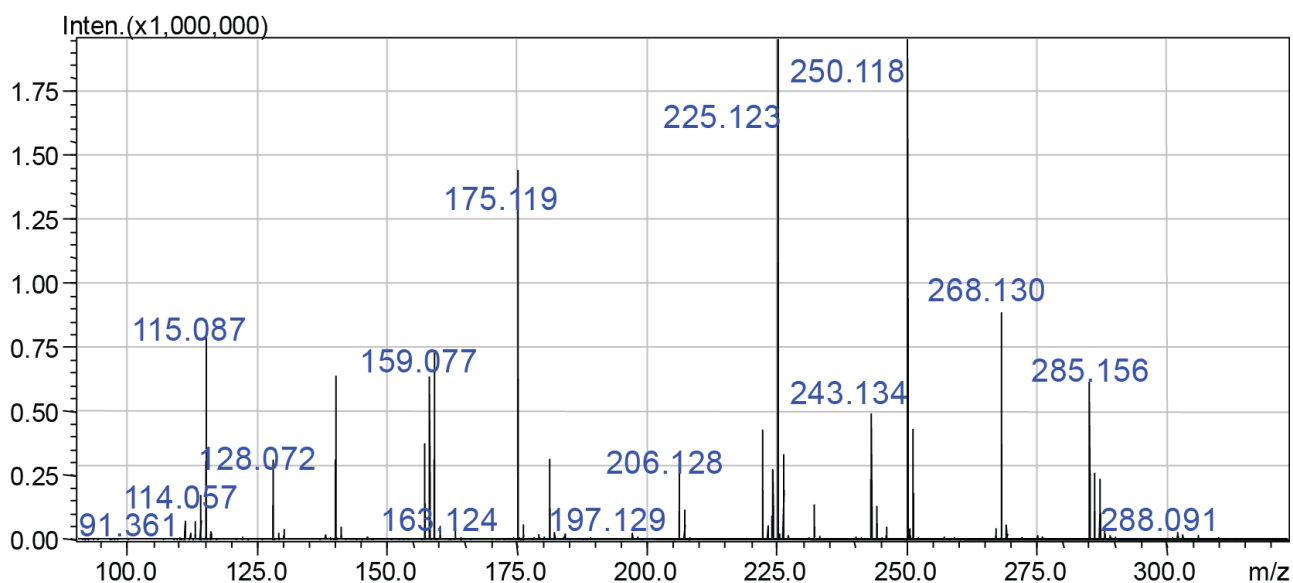

| $m/z$          | Formula                | Interpretation                                                     |
|----------------|------------------------|--------------------------------------------------------------------|
| 303.168        | $C_{12}H_{23}N_4O_5^+$ | $[M+H]^+$                                                          |
| 285.156        | $C_{12}H_{21}N_4O_4$   | Loss of $H_2O$                                                     |
| <b>268.130</b> | $C_{12}H_{18}N_3O_4$   | Loss of $H_2O$ and $NH_3$                                          |
| <b>250.118</b> | $C_{12}H_{16}N_3O_3$   | Loss of $2 \times H_2O$ and $NH_3$                                 |
| 243.134        | $C_{11}H_{19}N_2O_4$   | Loss of $CH_4N_2O$ , e.g., $NH_3$ and $HNCO$                       |
| <b>225.123</b> | $C_{11}H_{17}N_2O_3$   | Loss of $H_2O$ from $m/z$ 243                                      |
| 181.133        | $C_{10}H_{17}N_2O$     | Loss of $C_2H_6N_2O_4$ , e.g., $2 \times H_2O$ and $2 \times HNCO$ |
| <b>175.119</b> | $C_6H_{15}N_4O_2$      | Loss of $C_6H_8O_3$                                                |
| 159.077        | $C_6H_{11}N_2O_3$      | Loss of $C_6H_{12}N_2O_2$                                          |
| 140.082        | $C_6H_{10}N_3O$        | Loss of $C_6H_{13}NO_4$                                            |
| 128.072        | $C_6H_{10}NO_2$        | Loss of $C_6H_{13}N_3O_3$                                          |
| 115.087        | $C_5H_{11}N_2O$        | Loss of $C_7H_{12}N_2O_4$ or $C_6H_{12}N_2O_2$ and $CO_2$          |
| 91.361         |                        | Not consistent, too big mass defect                                |

**Figure S4.** (A) MS<sup>2</sup> spectra of the bioactive compound with  $m/z$  205.098, eluting at 10.0 min. (B) The proposed structure, and proposed fragmentation scheme of the bioactive compound with  $m/z$  205.098, eluting at 10.0 min.

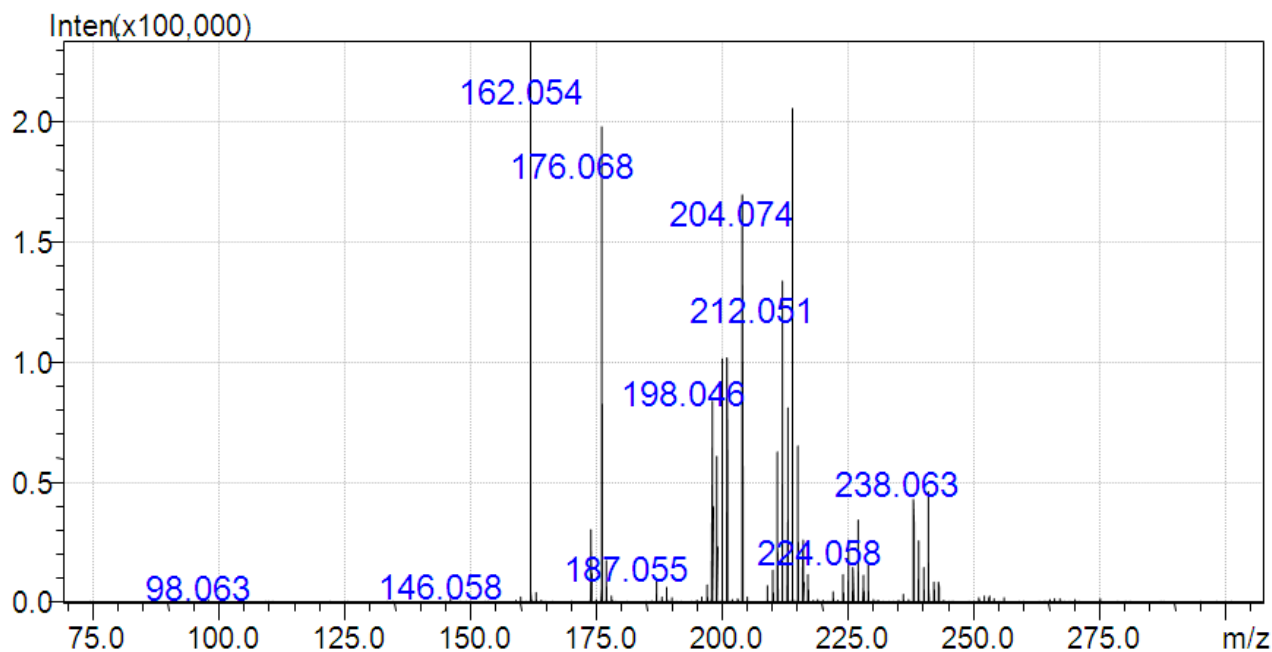

(A)

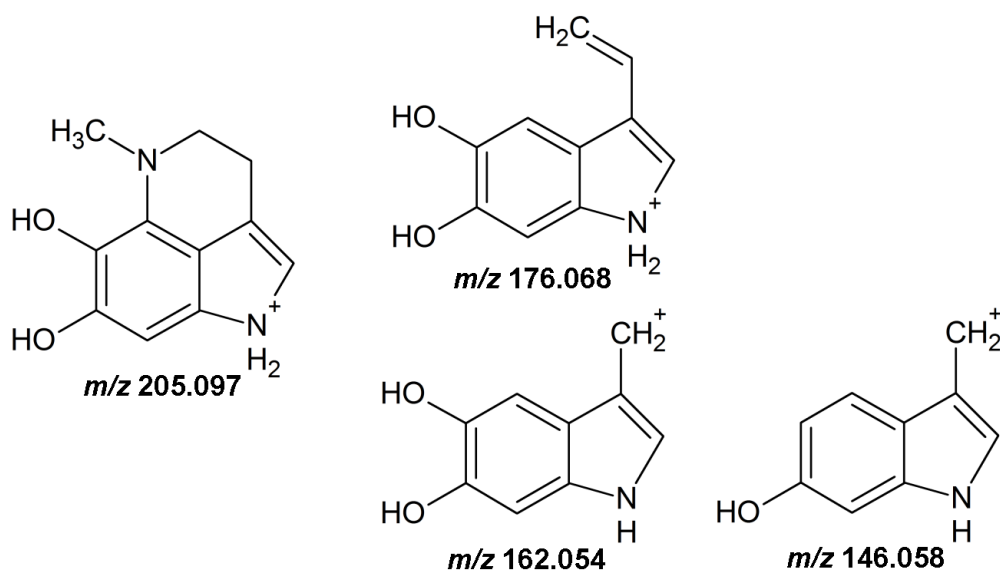

(B)

**Figure S5.** (A) MS<sup>2</sup> spectrum, proposed structure, and proposed fragmentation scheme of the bioactive compound with *m/z* 219.112, eluting at 10.5 min. (B) Proposed structure and proposed fragmentation scheme of the bioactive compound with *m/z* 219.112, eluting at 10.5 min.

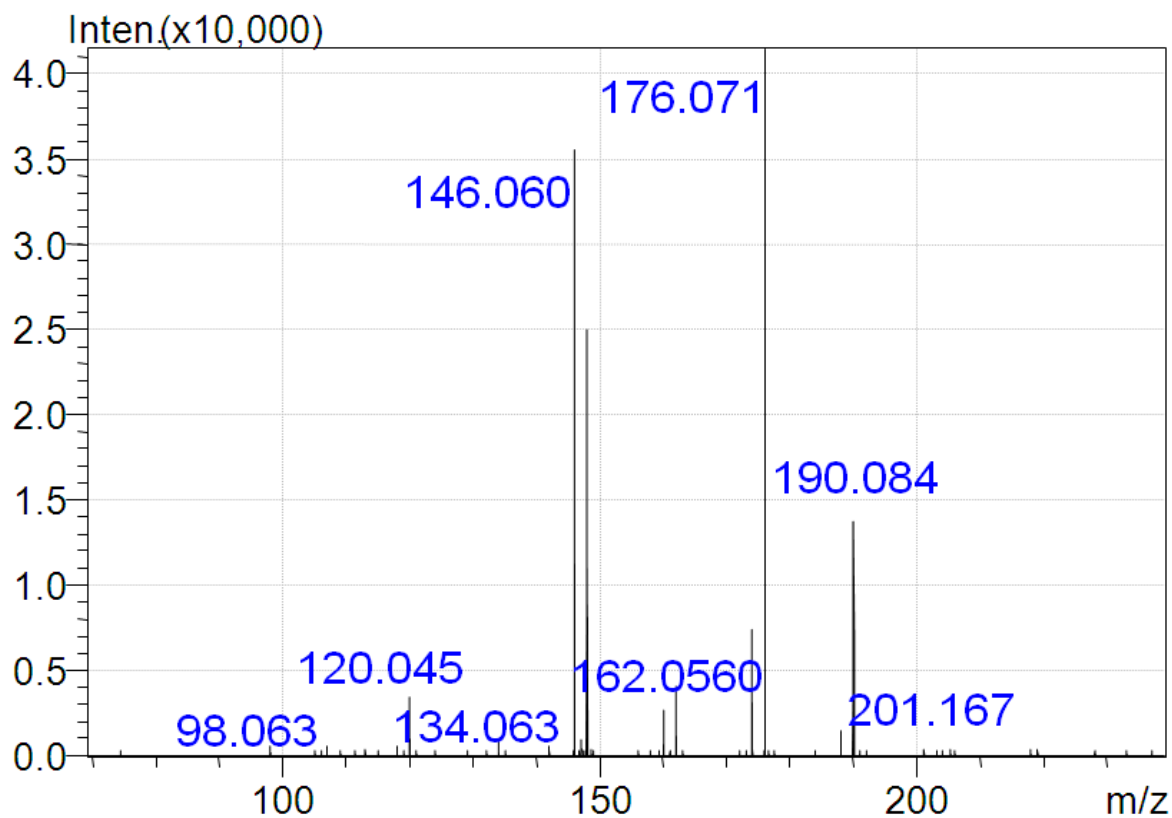

(A)

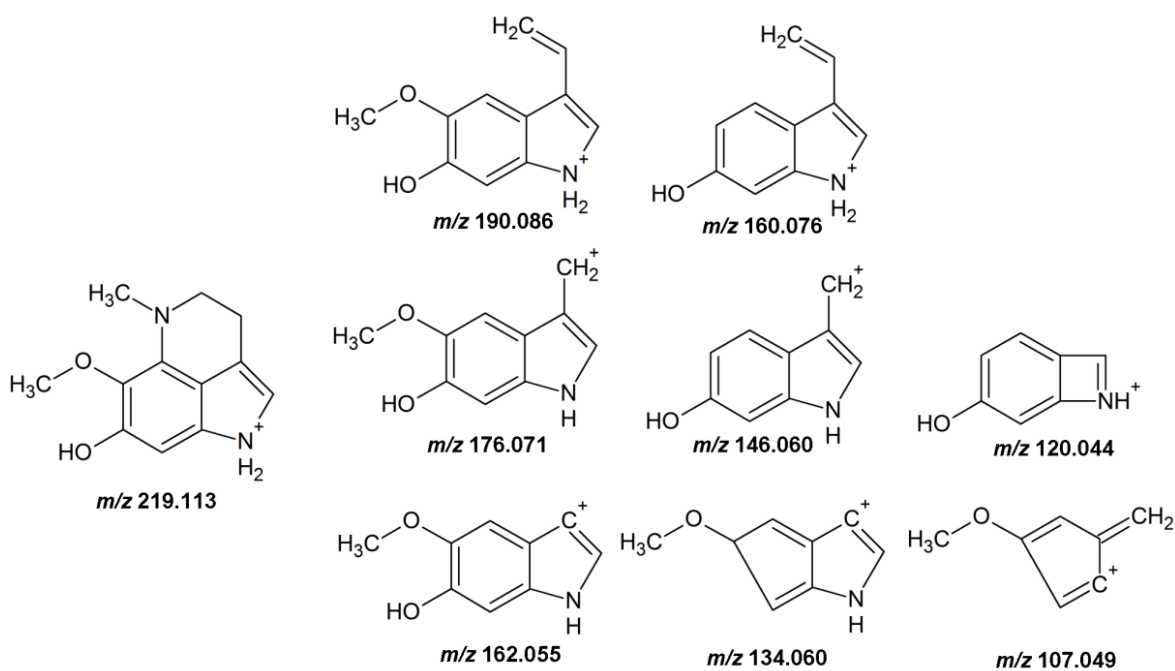

(B)

**Figure S6.** (A) MS<sup>2</sup> spectrum, proposed structure, and proposed fragmentation scheme of the bioactive compound with *m/z* 203.118, eluting at 10.5 min. (B) Proposed structure, and proposed fragmentation scheme of the bioactive compound with *m/z* 203.118, eluting at 10.5 min.

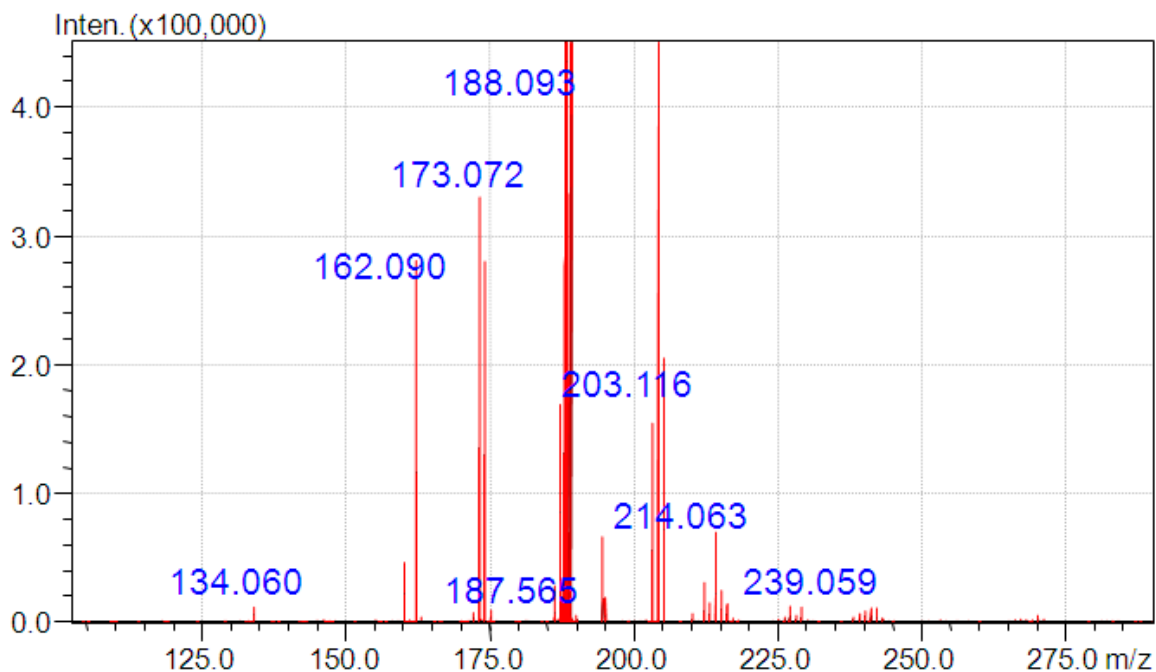

(A)

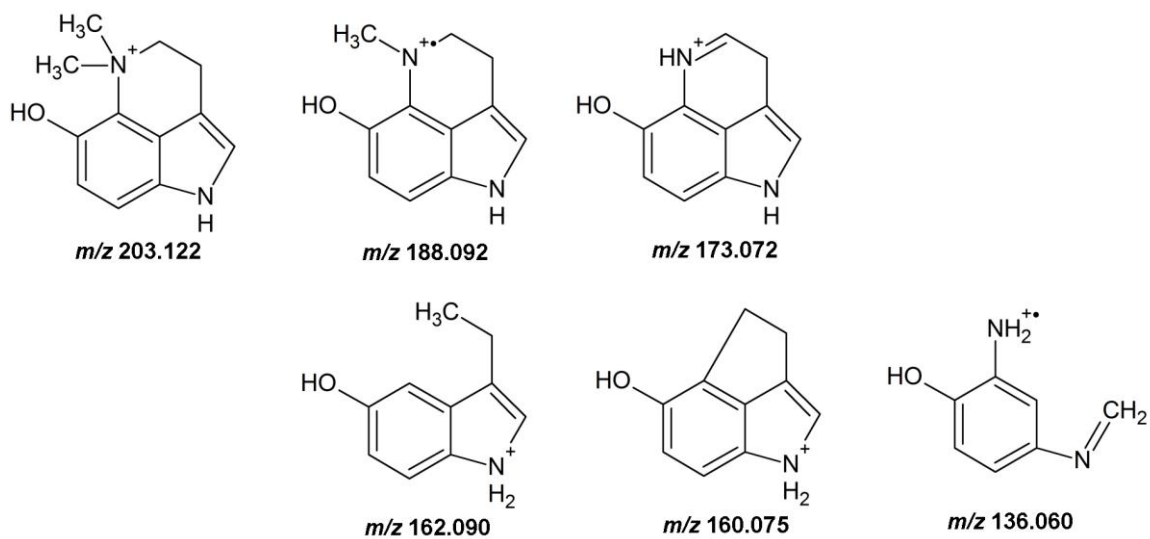

(B)

**Figure S7.** (A) HMBC-NMR spectrum of the bioactive compound with  $m/z$  203.118, eluting at 10.5 min. (B) HSQC-NMR spectrum of the bioactive compound with  $m/z$  203.118, eluting at 10.5 min. (C) HSQCHMBC-NMR spectrum of the bioactive compound with  $m/z$  203.118, eluting at 10.5 min.

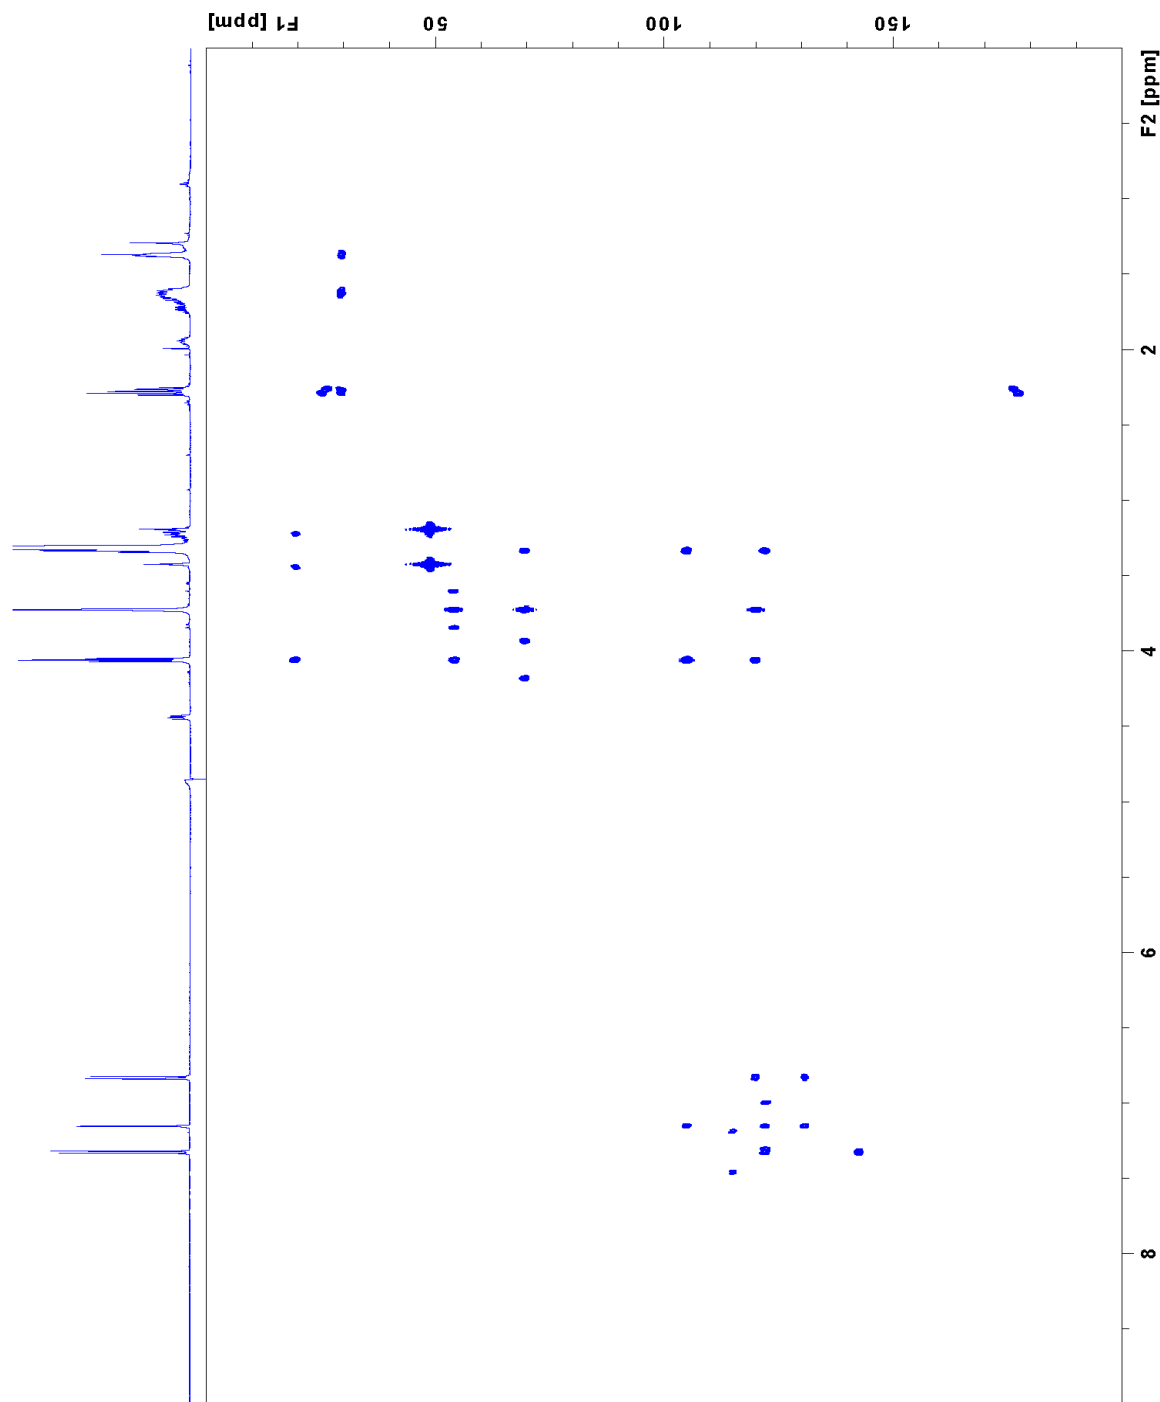

(A)

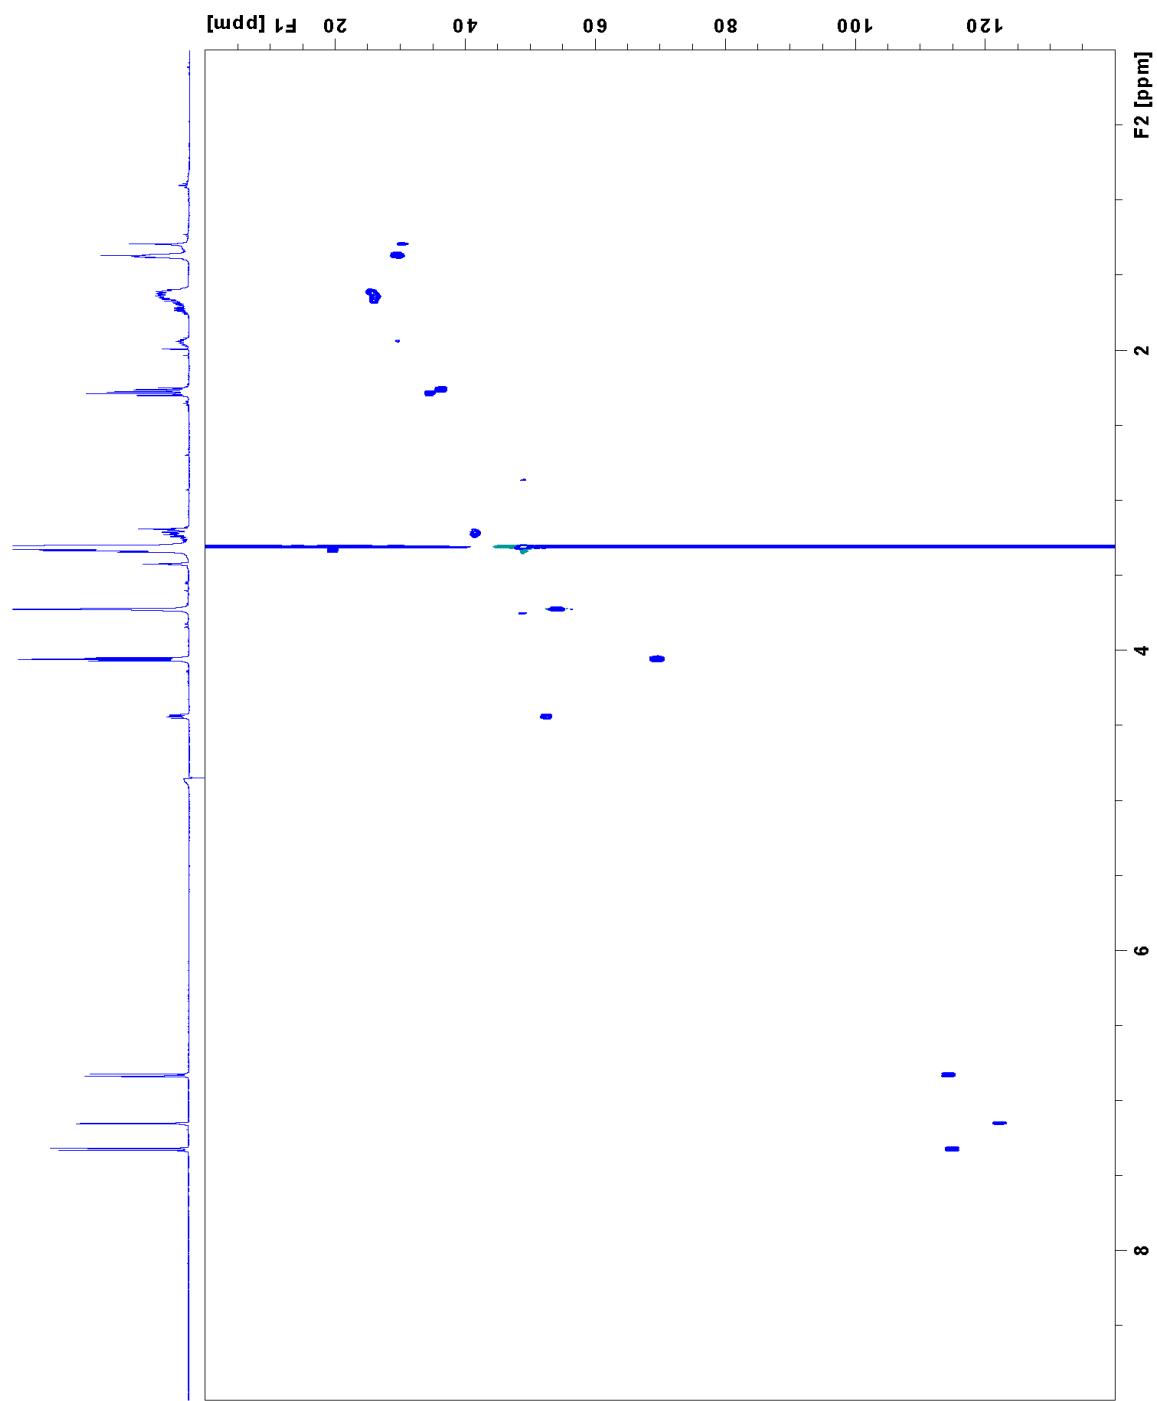

(B)



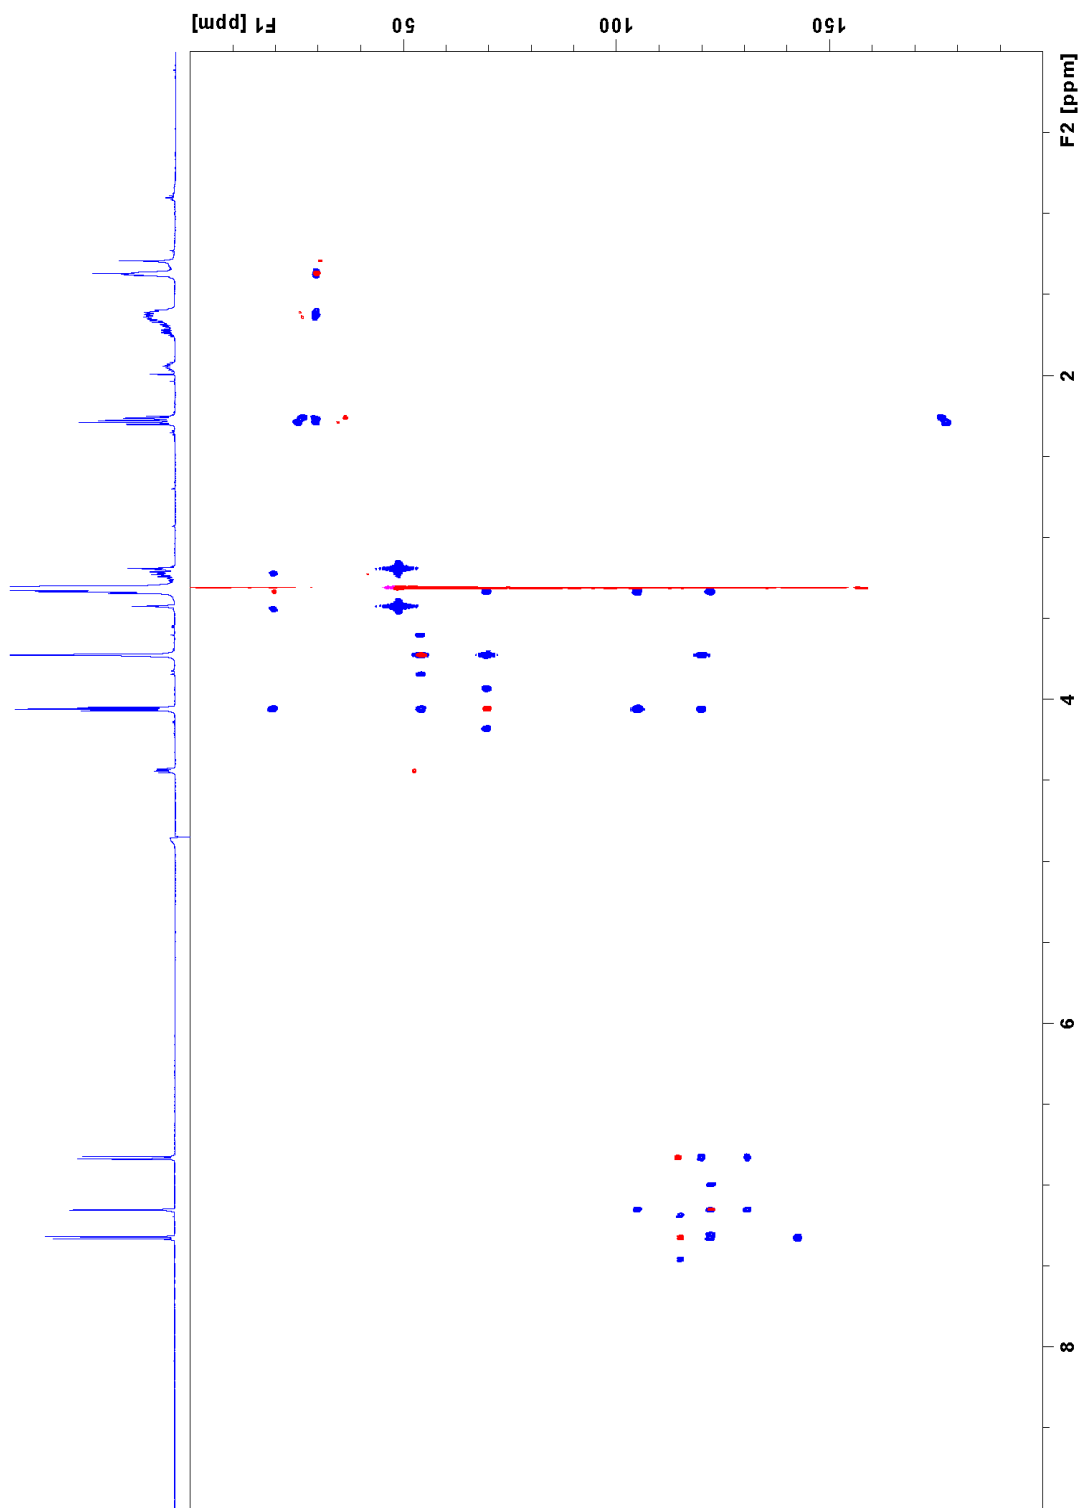

(C)

**Figure S8.** MS<sup>2</sup> spectrum, proposed structure, and proposed fragmentation scheme of the bioactive compound with *m/z* 401.235, eluting at 58.0 min. Most of the peaks in the MS<sup>2</sup> spectrum can be readily interpreted, e.g., in terms of water and CO losses, although it is generally unclear where exactly these losses occur.

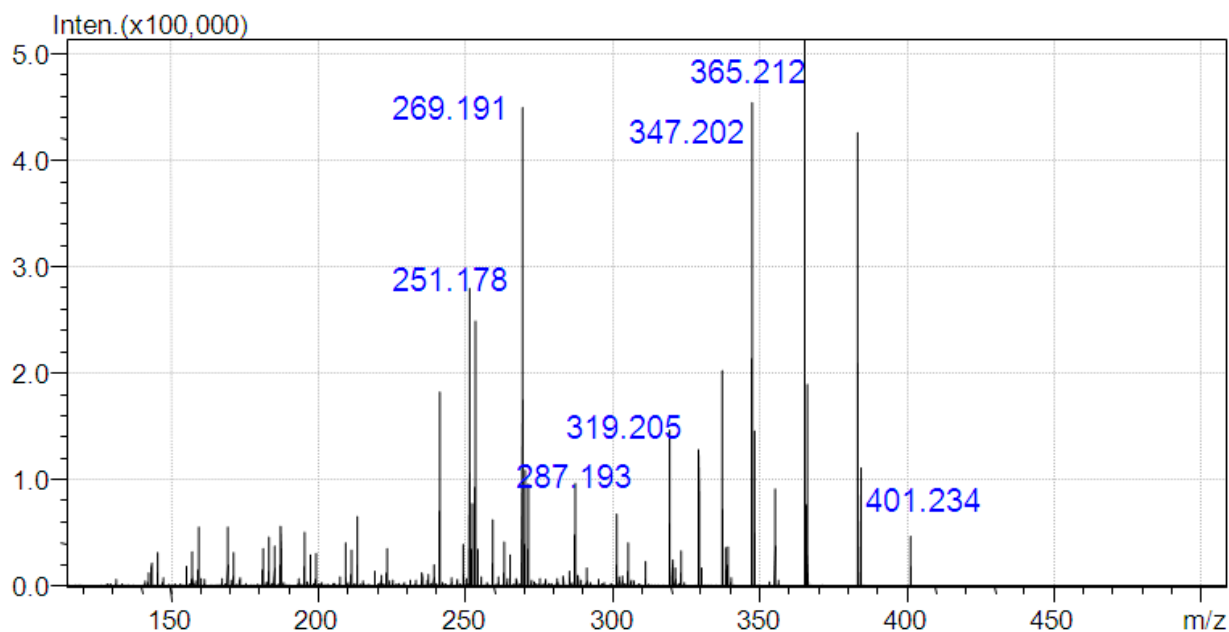

| <i>m/z</i>     | Formula                                                     | Interpretation                                                                                                                  |
|----------------|-------------------------------------------------------------|---------------------------------------------------------------------------------------------------------------------------------|
| <b>401.234</b> | C <sub>24</sub> H <sub>33</sub> O <sub>5</sub> <sup>+</sup> | [M+H] <sup>+</sup>                                                                                                              |
| <b>383.222</b> | C <sub>24</sub> H <sub>31</sub> O <sub>4</sub> <sup>+</sup> | Loss of H <sub>2</sub> O                                                                                                        |
| <b>365.212</b> | C <sub>24</sub> H <sub>29</sub> O <sub>3</sub> <sup>+</sup> | Loss of 2 × H <sub>2</sub> O; Loss of H <sub>2</sub> O from <i>m/z</i> 383                                                      |
| 355.228        | C <sub>23</sub> H <sub>31</sub> O <sub>5</sub> <sup>+</sup> | Loss of HCOOH or CO and H <sub>2</sub> O; Loss of CO from <i>m/z</i> 383                                                        |
| <b>347.202</b> | C <sub>24</sub> H <sub>27</sub> O <sub>2</sub> <sup>+</sup> | Loss of 3 × H <sub>2</sub> O; Loss of H <sub>2</sub> O from <i>m/z</i> 365                                                      |
| <b>337.218</b> | C <sub>23</sub> H <sub>29</sub> O <sub>2</sub> <sup>+</sup> | Loss of 2 × H <sub>2</sub> O and CO; Loss of H <sub>2</sub> O from <i>m/z</i> 355                                               |
| 329.191        | C <sub>24</sub> H <sub>25</sub> O <sup>+</sup>              | Loss of 4 × H <sub>2</sub> O; Loss of H <sub>2</sub> O from <i>m/z</i> 347                                                      |
| 319.205        | C <sub>23</sub> H <sub>27</sub> O <sup>+</sup>              | Loss of 3 × H <sub>2</sub> O and CO; Loss of H <sub>2</sub> O from <i>m/z</i> 337                                               |
| 301.195        | C <sub>23</sub> H <sub>25</sub> <sup>+</sup>                | Loss of 4 × H <sub>2</sub> O and CO; Loss of H <sub>2</sub> O from <i>m/z</i> 319                                               |
| 287.193        |                                                             | No matches within 5 mDa                                                                                                         |
| <b>269.191</b> | C <sub>19</sub> H <sub>25</sub> O <sup>+</sup>              | Loss of C <sub>5</sub> H <sub>8</sub> O <sub>4</sub> ; Loss of C <sub>5</sub> H <sub>4</sub> O <sub>2</sub> from <i>m/z</i> 365 |
| 253.196        | C <sub>19</sub> H <sub>25</sub> <sup>+</sup>                | Loss of C <sub>4</sub> H <sub>4</sub> O <sub>2</sub> from <i>m/z</i> 337                                                        |
| <b>251.178</b> | C <sub>19</sub> H <sub>23</sub> <sup>+</sup>                | Loss of H <sub>2</sub> O from <i>m/z</i> 269                                                                                    |
| 241.159        | C <sub>17</sub> H <sub>21</sub> O <sup>+</sup>              | Loss of C <sub>2</sub> H <sub>4</sub> from <i>m/z</i> 269                                                                       |
| 213.164        | C <sub>16</sub> H <sub>21</sub> <sup>+</sup>                | Loss of CO from <i>m/z</i> 241                                                                                                  |

**Figure S9.** (A) COSY-NMR spectrum of the bioactive compound with  $m/z$  401.235, eluting at 58.0 min. (B) TOCSY-NMR spectrum of the bioactive compound with  $m/z$  401.235, eluting at 58.0 min.

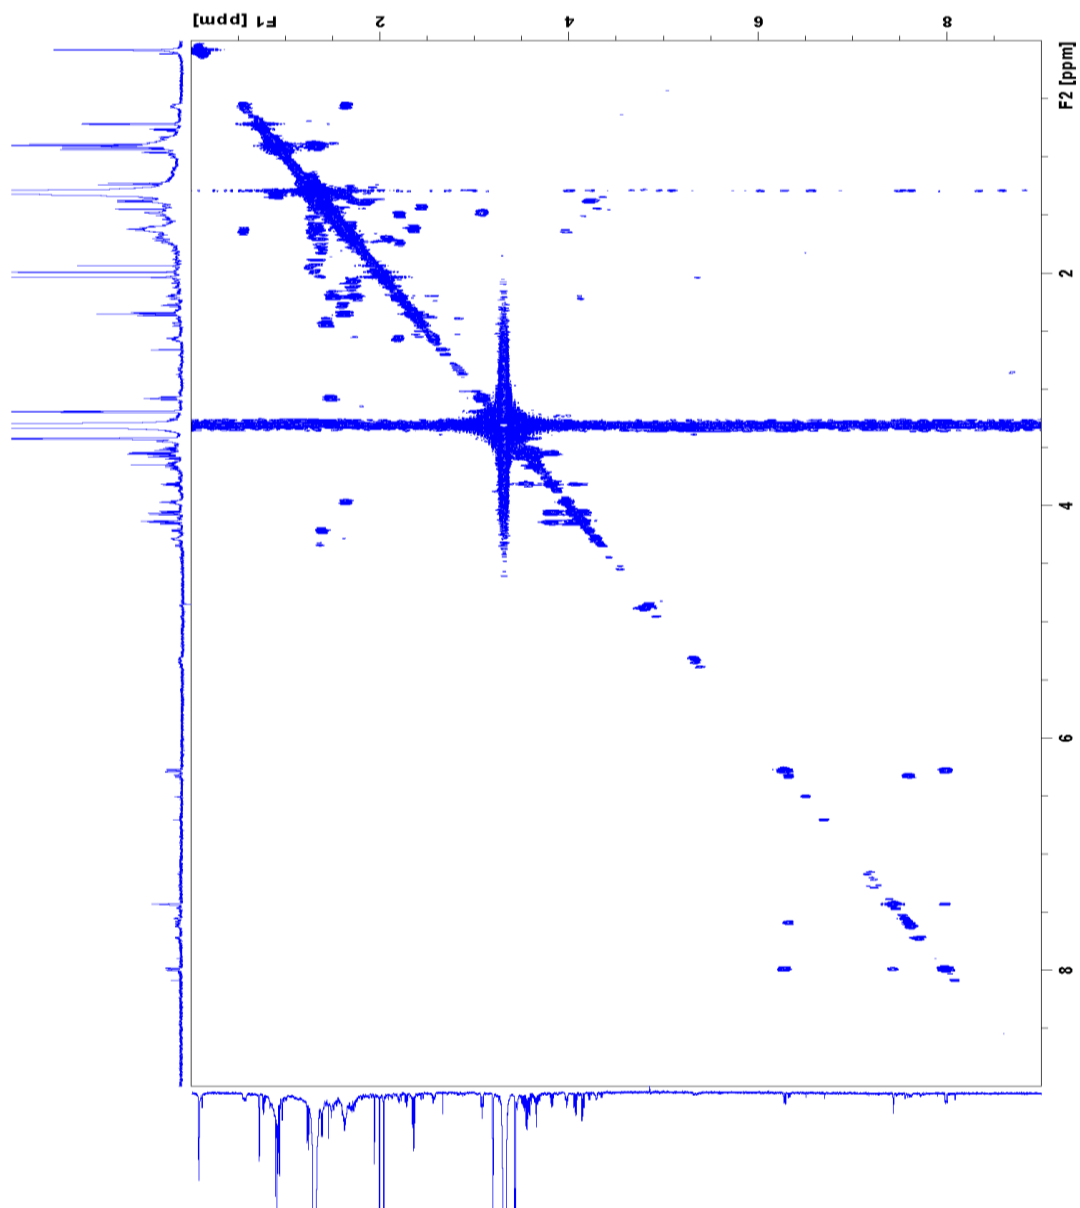

(A)

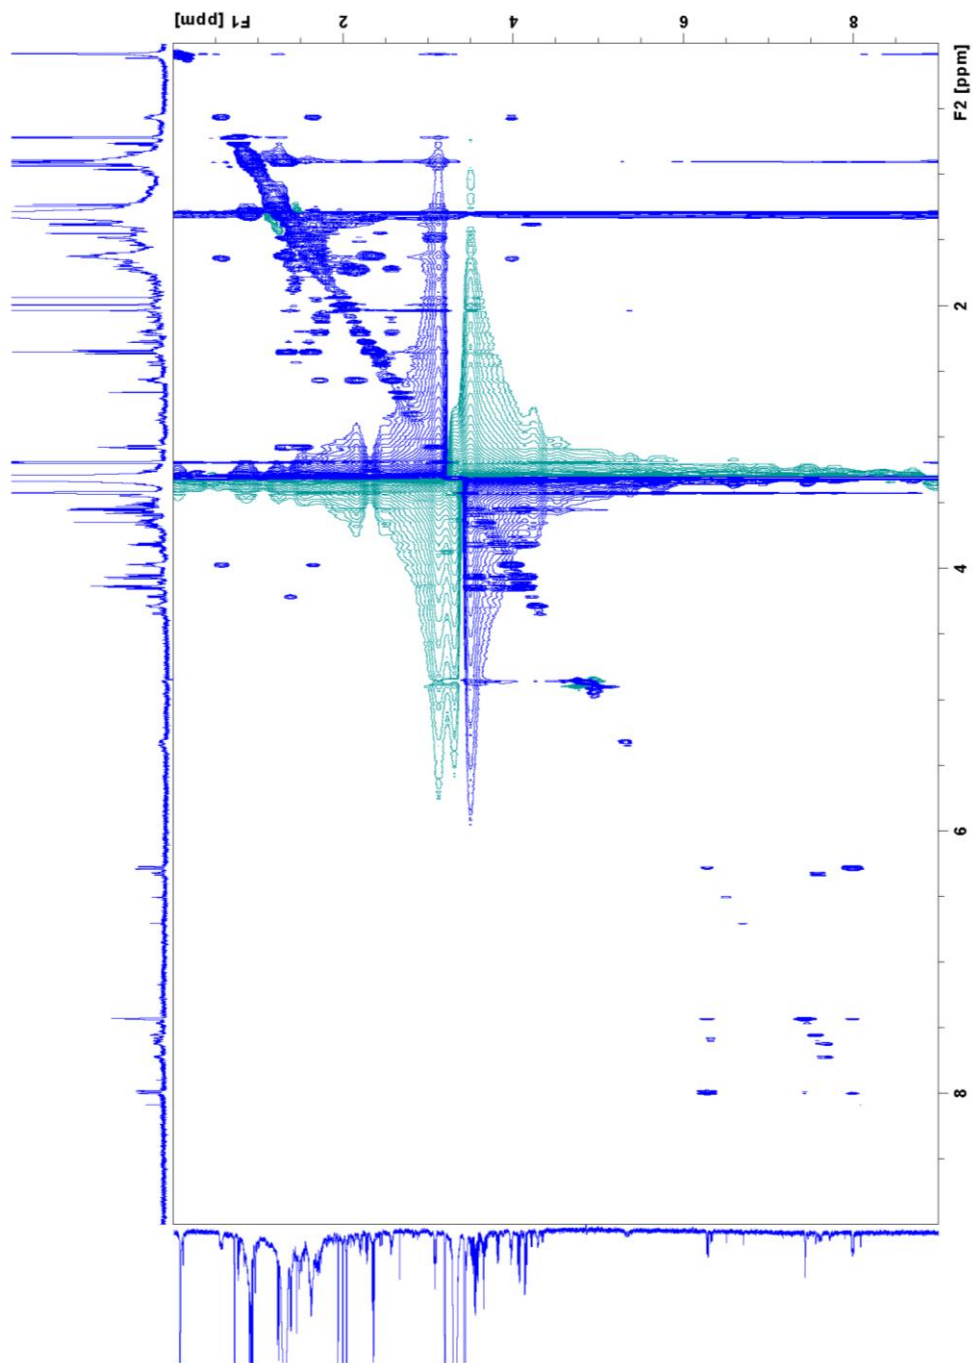

(B)

**Figure S10.** (A) MS<sup>2</sup> spectrum of the bioactive compound with  $m/z$  713.412, eluting at 62.0 min. (B) Proposed structure and proposed fragmentation scheme of the bioactive compound with  $m/z$  713.412, eluting at 62.0 min. The minor fragments can be considered as secondary fragments of the ion with  $m/z$  331 and are consistent with subsequent losses of H<sub>2</sub>O, CO and/or NH<sub>3</sub>, e.g., loss of water to the ion with  $m/z$  313, loss of NH<sub>3</sub> to  $m/z$  296, loss of H<sub>2</sub>O to  $m/z$  278, and either loss of H<sub>2</sub>O to  $m/z$  260 or CO to  $m/z$  250. The ion with  $m/z$  253 is consistent with the loss of HN=C=CH and 2 × H<sub>2</sub>O from the fragment ion with  $m/z$  331.

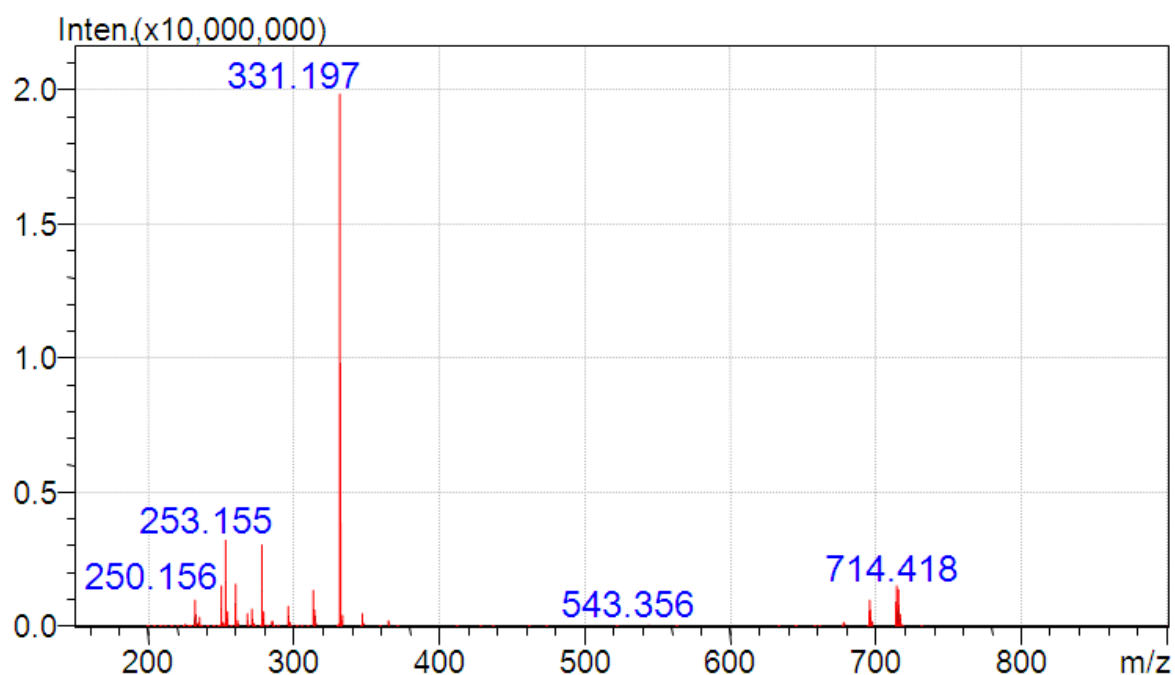

(A)

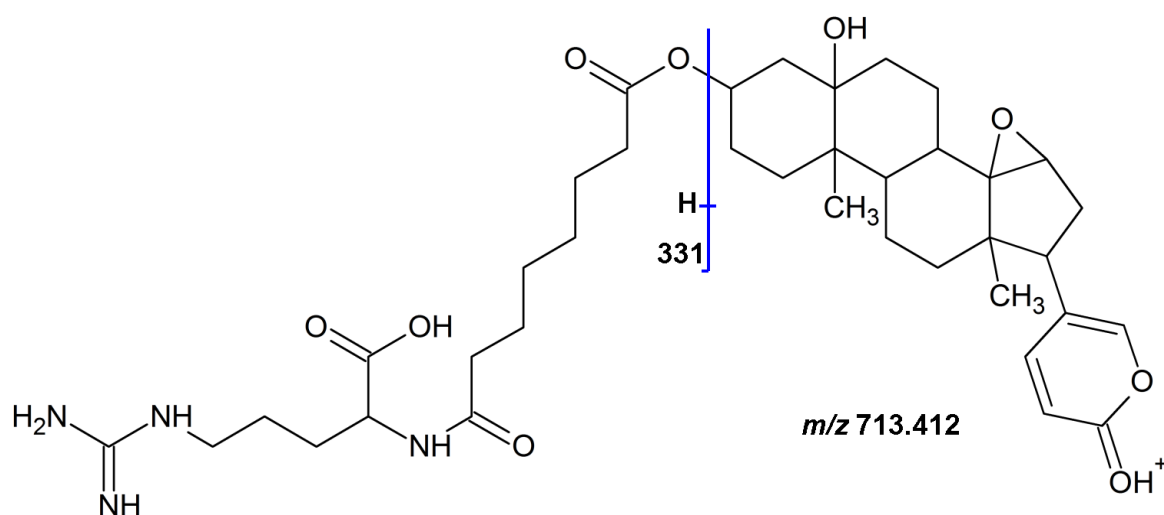

(B)
